# Supplementary material
Source: PubMed Central journal article supplement (PMC2739662)
Supplement: NIHMS130788-supplement-01.pdf [file NIHMS130788-supplement-01.pdf]

Type of file: figure

Label: Fig 1

Filename: 2008 McColl JBC supplemental figures.pdf

## SUPPLEMENTAL INFORMATION

Supplemental Experimental Procedures. *mRNA quantitation by real time polymerase chain reaction* - Sample preparation and total RNA extraction was performed as described for microarray analysis. 450 ng of this total RNA was then reverse transcribed using a MessageSensor RT kit (Ambion Inc) using random decamers, and diluted to a 3ng/ul equivalent template for real-time PCR. TaqMan Gene Expression Assay 20X primers for each gene were purchased from Applied Biosystems and used with their “Two-Step RT-PCR” protocol. The volume per reaction was reduced to 10ul, and all samples were run in triplicate. Real-time PCR was carried out in a 384-well format on a 7900HT PCR machine (Applied Biosystems) using conditions recommended for the primers used.

Supplemental FIGURE 1. **Ordered distance matrix and clusters (black outlines) based on HOPACH of differentially expressed genes in response to 10mM LiCl.** A total of 99 genes at a FWER cut-off of  $< 0.05$  form 9 associated 1<sup>st</sup> level clusters as shown with colors red to purple representing distances close to far.

Supplemental FIGURE 2. **Graph of randomly chosen genes within each cluster showing  $\log_2$  relative expression across all replicates.** The thick blue line is the medoid of the respective cluster and is the representative profile. Replicates are ordered by treatment group.

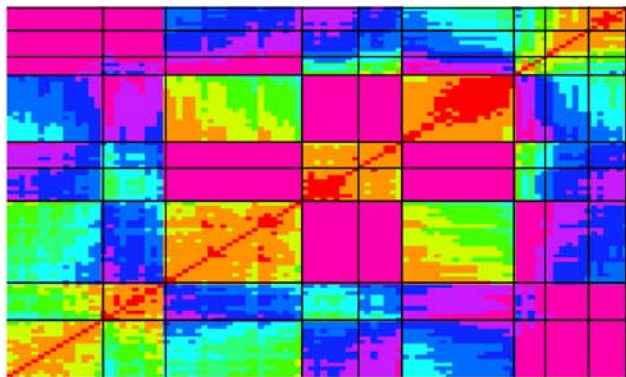

Supplemental Fig. 1

Cluster 1

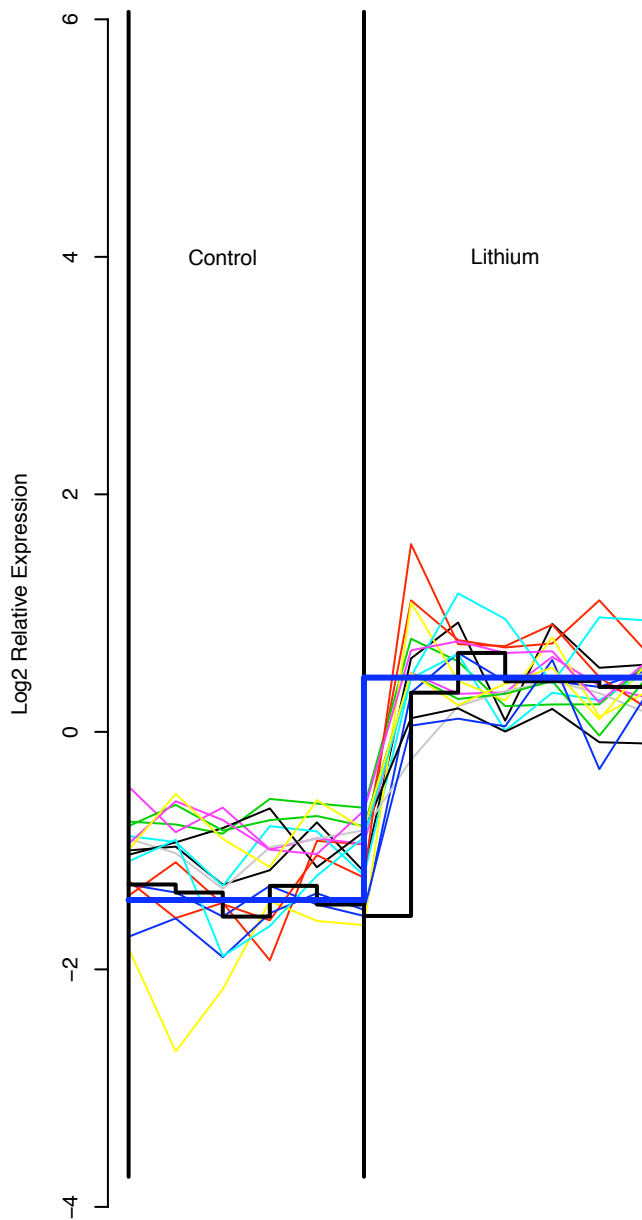

Cluster 2

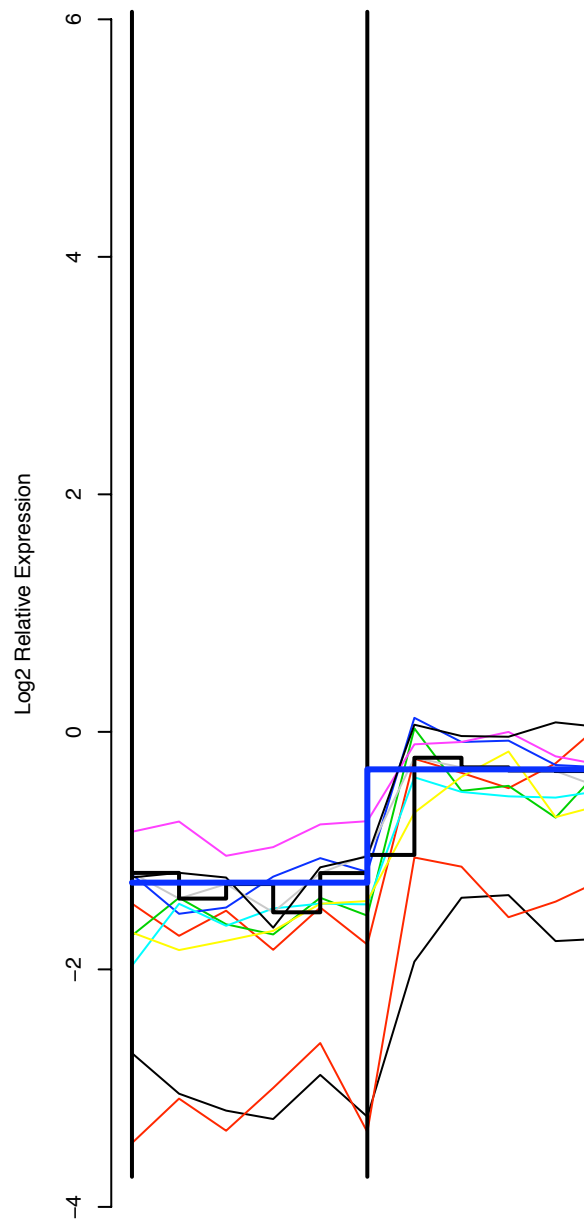

Cluster 3

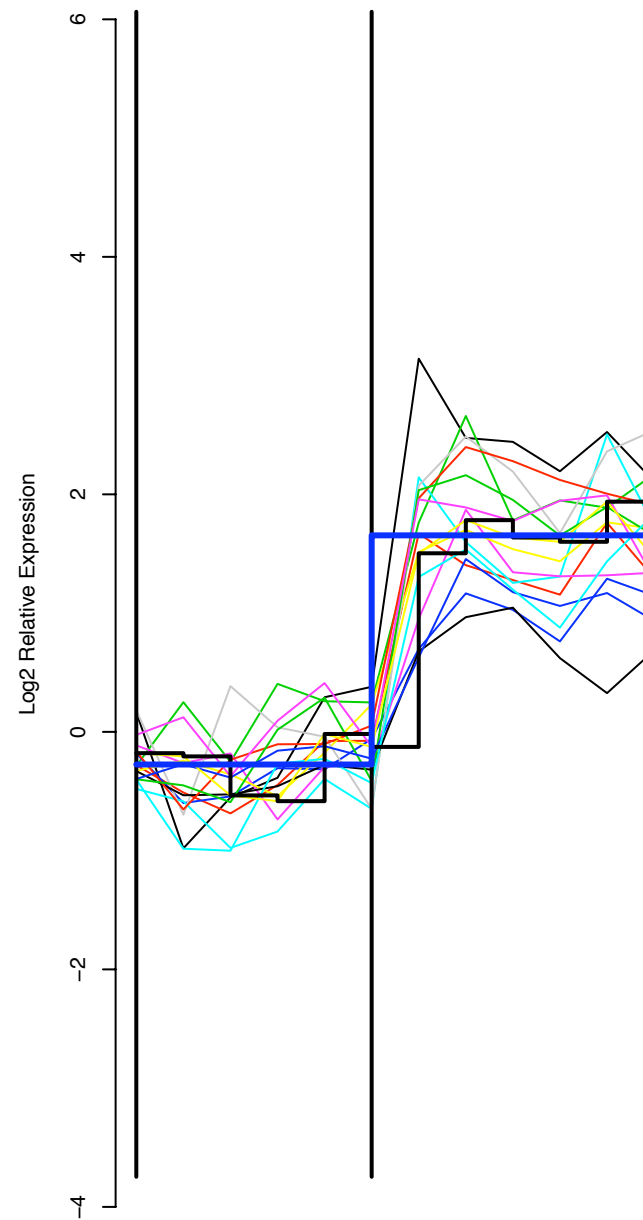

Cluster 4

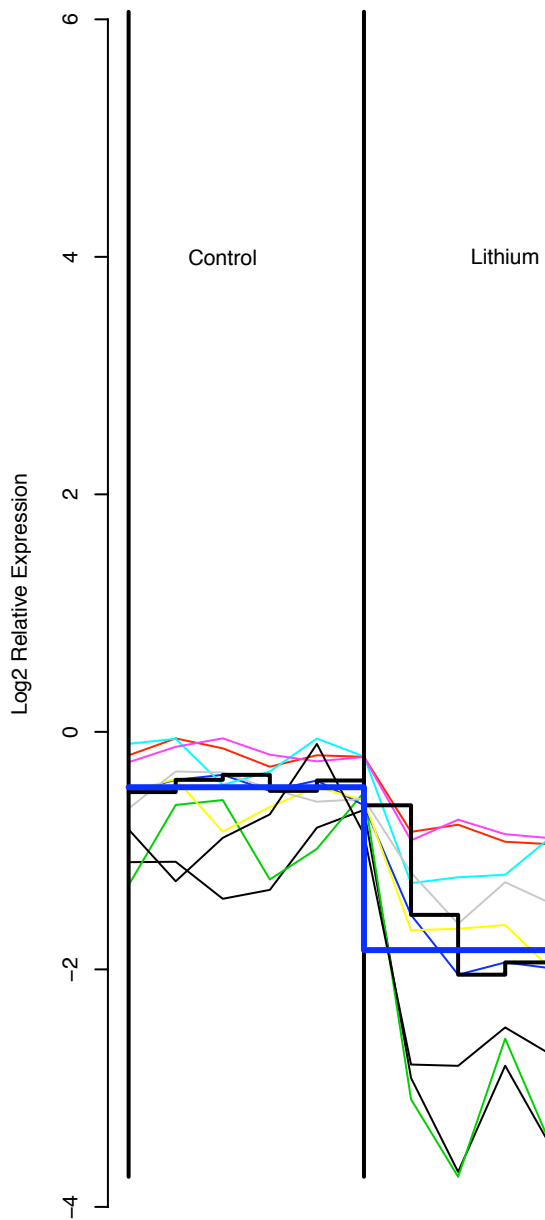

Cluster 5

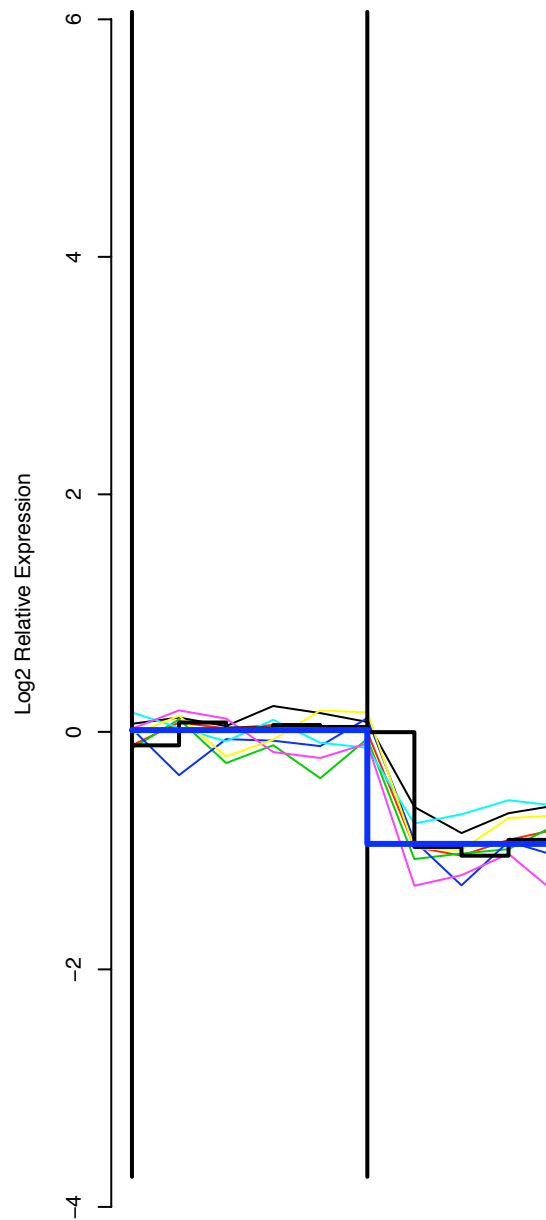

Cluster 6

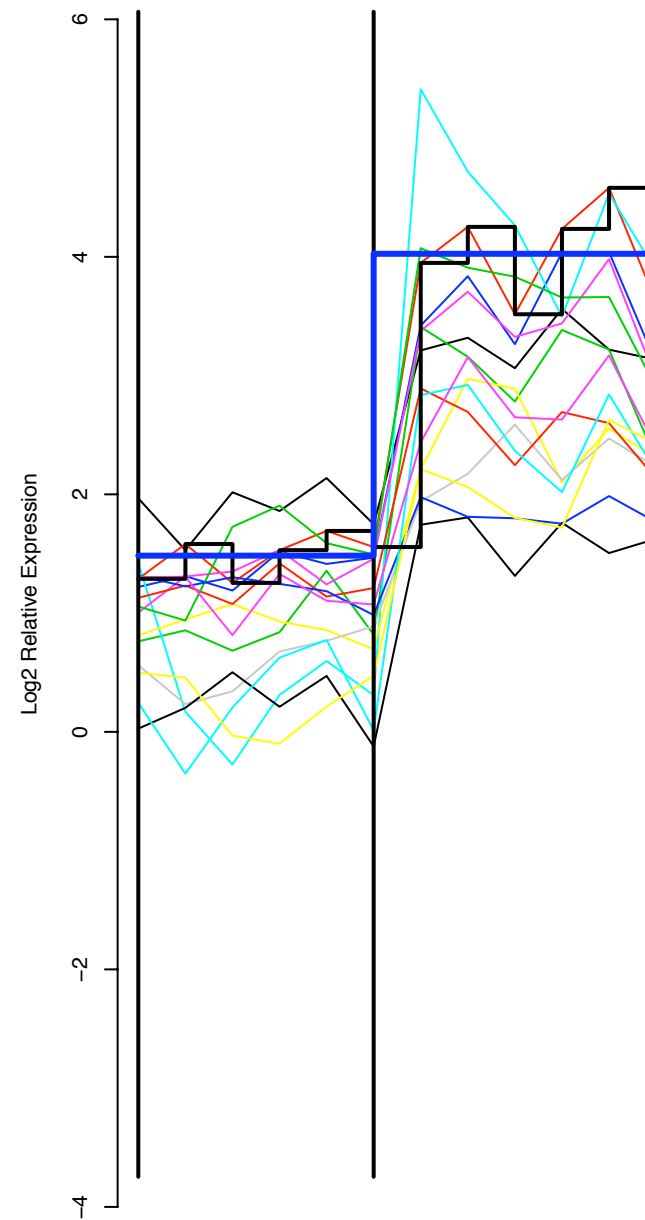

Cluster 7

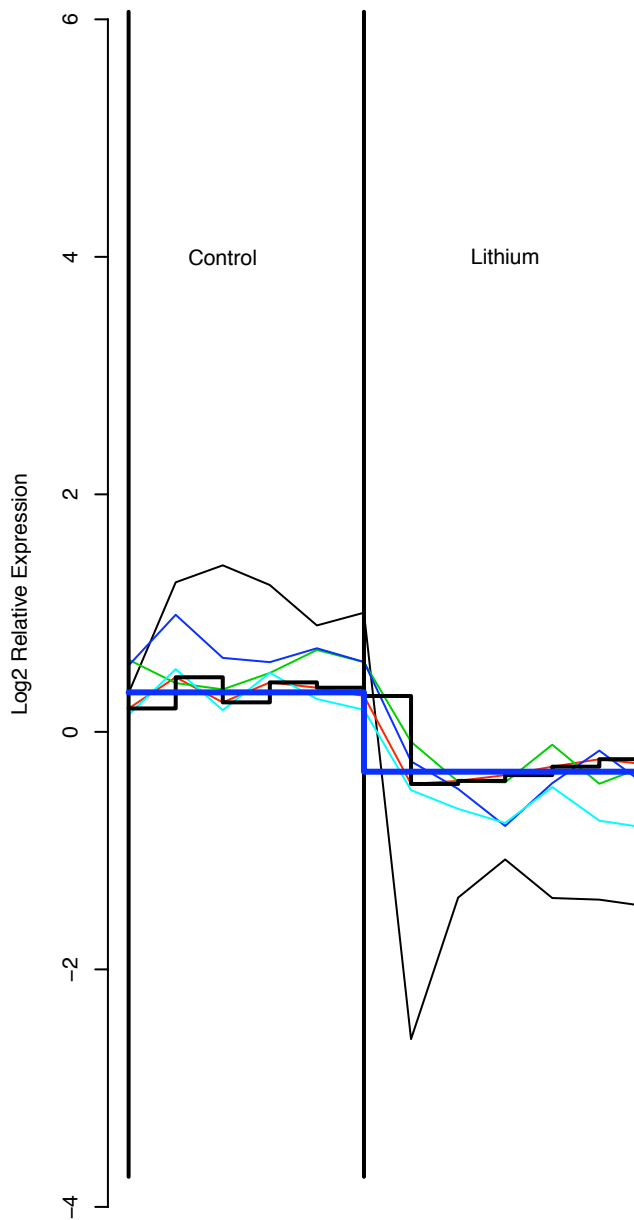

Cluster 8

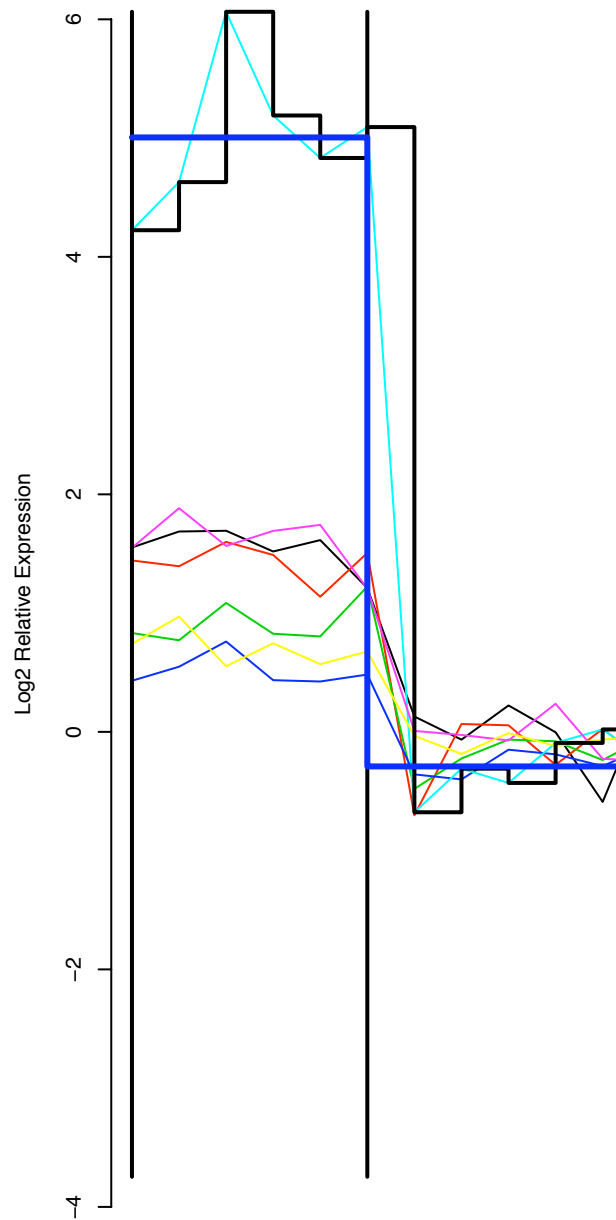

Cluster 9

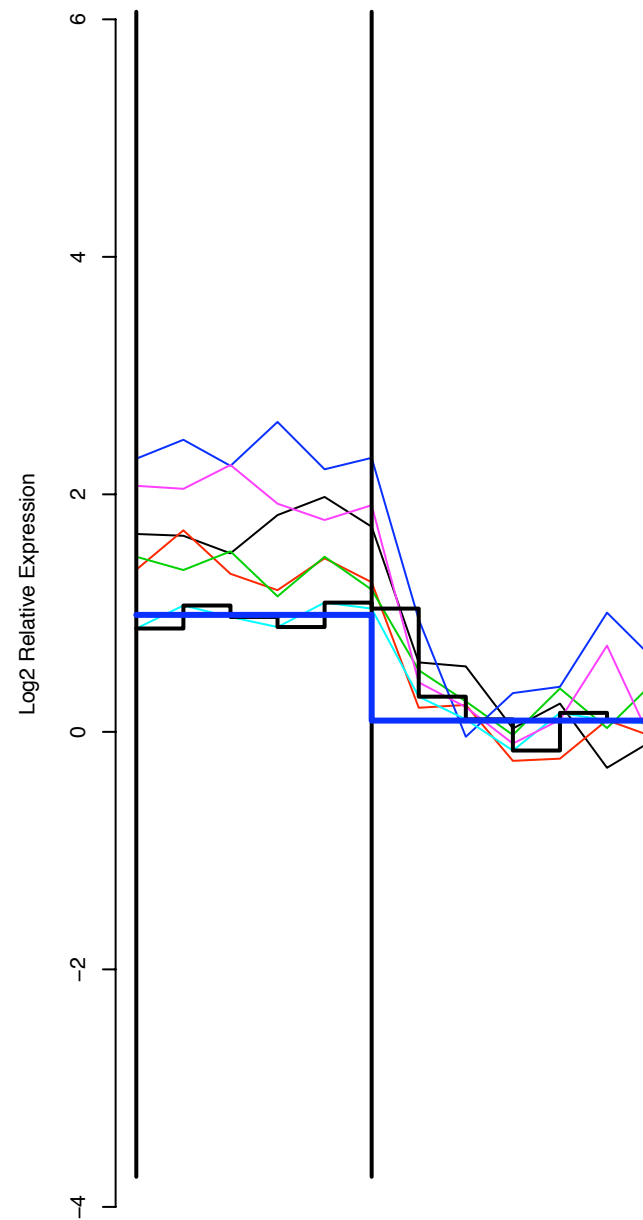

Type of file: table

Label: Supp Table 1

Filename: 2008 McColl JBC supplemental tabel 1.pdf

**SUPPLEMENTAL TABLE I**

Mean elemental content of Nematode Growth Media (NGM) with and without 10mM LiCl.

| <b>Element</b> | <b>Control NGM</b> |            | <b>10 mM LiCl NGM</b> |            |     |
|----------------|--------------------|------------|-----------------------|------------|-----|
|                | <b>mM</b>          | <b>SEM</b> | <b>mM</b>             | <b>SEM</b> |     |
| <b>B</b>       | 1.58E-01           | 4.00E-06   | 1.59E-01              | 1.02E-06   |     |
| <b>Ca</b>      | 1.34E+00           | 2.83E-05   | 1.37E+00              | 9.68E-06   |     |
| <b>Fe</b>      | 8.72E-03           | 4.15E-07   | 8.84E-03              | 4.48E-08   |     |
| <b>Li</b>      | -                  | -          | 1.07E+01              | 1.25E-04   | *** |
| <b>Mg</b>      | 2.24E+00           | 5.94E-05   | 2.29E+00              | 1.58E-05   |     |
| <b>Na</b>      | 6.74E+01           | 2.06E-03   | 7.00E+01              | 2.74E-04   |     |
| <b>Rb</b>      | 2.21E-03           | 8.91E-08   | 2.35E-03              | 1.89E-08   |     |
| <b>S</b>       | 4.78E+00           | 1.22E-04   | 4.96E+00              | 3.52E-05   |     |
| <b>Si</b>      | 1.66E-01           | 5.27E-06   | 1.60E-01              | 1.03E-06   |     |
| <b>Sr</b>      | 1.61E-03           | 4.88E-08   | 1.63E-03              | 9.86E-09   |     |
| <b>Zn</b>      | 8.32E-04           | 6.49E-08   | 1.19E-03              | 3.38E-07   |     |

-, below detection limit of 4.60E-02 mM; \*\*\*, p&lt;0.0001.



Type of file: table

Label: Supp Table 2

Filename: 2008 McColl JBC supplemental tabel 2.pdf

**SUPPLEMENTAL TABLE II**Mean elemental content of *C. elegans* treated with 10 mM LiCl.

| Element   | control    |          | 10mM LiCl  |          |     |
|-----------|------------|----------|------------|----------|-----|
|           | nmols/worm | SEM      | nmols/worm | SEM      |     |
| <b>Ca</b> | 7.41E-02   | 1.80E-03 | 7.49E-02   | 4.37E-04 |     |
| <b>Cu</b> | 2.02E-05   | 7.90E-07 | 1.95E-05   | 4.55E-07 |     |
| <b>Fe</b> | 1.42E-03   | 3.23E-05 | 1.39E-03   | 6.77E-06 |     |
| <b>K</b>  | 2.87E-01   | 5.74E-03 | 2.68E-01   | 1.91E-03 | *   |
| <b>Li</b> | -          | -        | 6.03E-03   | 4.59E-05 | *** |
| <b>Mg</b> | 7.84E-02   | 1.14E-03 | 7.58E-02   | 5.37E-04 |     |
| <b>Mn</b> | 1.32E-04   | 1.23E-06 | 1.27E-04   | 6.00E-07 |     |
| <b>Na</b> | 7.29E-02   | 1.85E-04 | 6.35E-02   | 6.69E-04 | **  |
| <b>P</b>  | 5.89E-01   | 5.72E-03 | 5.87E-01   | 5.30E-03 |     |
| <b>S</b>  | 1.64E-01   | 2.39E-03 | 1.57E-01   | 2.50E-04 | *   |
| <b>Sr</b> | 4.45E-05   | 1.13E-06 | 4.46E-05   | 2.87E-07 |     |
| <b>Zn</b> | 9.30E-04   | 8.12E-06 | 8.95E-04   | 5.18E-06 | *   |

-, below detection limits of 4.50E-04 nmols/worm; \*, p&lt;0.05; \*\*, p&lt;0.01; \*\*\*, p&lt;0.0001.

Type of file: table

Label: Supp Table 3

Filename: 2008 McColl JBC supplemental tabel 3.pdf

**SUPPLEMENTAL TABLE III part i.**

Gene transcript changes (down-regulated) in response to 10mM LiCl.

| Gene          | Description                                                                                       | Geo.<br>Mean<br>ratio* | Raw<br>p-value** | FWER<br>(Bonf)*** | FDR<br>(BH)**** |
|---------------|---------------------------------------------------------------------------------------------------|------------------------|------------------|-------------------|-----------------|
| F21F3.3       | Predicted protein S<br>isoprenylsysteine O-<br>methyltransferase                                  | 0.03                   | 2.97E-09         | 6.65E-05          | 2.22E-05        |
| <i>lea-1</i>  | Predicted protein to be<br>hydrophilic and heat-resistant,<br>may participate in<br>anhydrobiosis | 0.17                   | 2.11E-06         | 0.04723           | 0.000477        |
| ZK813.1       | Predicted chorion protein                                                                         | 0.19                   | 1.35E-06         | 0.030089          | 0.000397        |
| Y62H9A.4      | Unknown function                                                                                  | 0.22                   | 9.23E-07         | 0.020646          | 0.000358        |
| C04H5.7       | Unknown function                                                                                  | 0.24                   | 7.62E-07         | 0.017049          | 0.000334        |
| T08B6.5       | RNA binding protein                                                                               | 0.28                   | 1.07E-06         | 0.023937          | 0.000364        |
| K09E3.7       | Putative coiled coil-4 domain<br>protein                                                          | 0.29                   | 2.71E-07         | 0.006062          | 0.000225        |
| F14H3.5       | Putative coiled coil-4 domain<br>protein                                                          | 0.32                   | 6.89E-08         | 0.001542          | 0.00014         |
| T08D10.2      | Ortholog of the human histone<br>(H3K4) demethylase LSD1                                          | 0.33                   | 3.81E-07         | 0.008523          | 0.000251        |
| F38C2.5       | CCCH-type Zn-finger protein                                                                       | 0.34                   | 1.91E-06         | 0.042671          | 0.000462        |
| C35E7.1       | Uncharacterized coiled-coil<br>containing protein                                                 | 0.34                   | 1.60E-06         | 0.035897          | 0.000436        |
| T08A9.6       | Predicted F-box containing<br>protein                                                             | 0.38                   | 2.18E-07         | 0.004869          | 0.000203        |
| <i>cdh-4</i>  | Cadherin superfamily member                                                                       | 0.39                   | 3.19E-08         | 0.000714          | 0.000102        |
| <i>sax-3</i>  | Protein involved in sensory<br>axon guidance.                                                     | 0.46                   | 1.06E-06         | 0.023815          | 0.000364        |
| K09E9.3       | Putative coiled coil-4 domain<br>protein                                                          | 0.46                   | 7.37E-07         | 0.016484          | 0.000334        |
| <i>dhc-1</i>  | Cytoplasmic dynein heavy<br>chain homolog                                                         | 0.47                   | 7.62E-07         | 0.017041          | 0.000334        |
| <i>tag-52</i> | Frabin actin binding protein                                                                      | 0.47                   | 1.72E-06         | 0.03848           | 0.000447        |
| F45C12.15     | Homeobox domain containing<br>protein                                                             | 0.47                   | 1.62E-06         | 0.036204          | 0.000436        |
| ZK856.11      | Predicted translation initiation<br>factor related to eIF-1A                                      | 0.51                   | 1.13E-06         | 0.025344          | 0.000364        |
| <i>ten-1</i>  | Tenurin                                                                                           | 0.51                   | 1.13E-06         | 0.025366          | 0.000364        |
| C54H2.1       | Novel protein, synthetic lethal<br>with <i>mec-8</i>                                              | 0.51                   | 4.85E-10         | 1.09E-05          | 5.43E-06        |
| F22D6.2       | Predicted Zn-finger protein                                                                       | 0.52                   | 1.06E-06         | 0.023657          | 0.000364        |
| <i>ugt-45</i> | UDP-glucuronosyl transferase                                                                      | 0.52                   | 9.28E-07         | 0.020768          | 0.000358        |
| F52D2.7       | Unknown function                                                                                  | 0.54                   | 2.03E-07         | 0.004543          | 0.000203        |
| C17G1.4       | Unknown function                                                                                  | 0.55                   | 1.51E-06         | 0.033773          | 0.000423        |

|                |                                                          |      |          |          |          |
|----------------|----------------------------------------------------------|------|----------|----------|----------|
| R05F9.6        | Predicted mitochondrial phosphoglucomutase               | 0.56 | 1.21E-06 | 0.027106 | 0.000371 |
| <i>pfn-1</i>   | Profilin.                                                | 0.57 | 2.04E-06 | 0.045736 | 0.000468 |
| <i>rde-3</i>   | Nucleotidyltransferase                                   | 0.58 | 4.03E-07 | 0.009005 | 0.000256 |
| <i>ced-7</i>   | Predicted ATP-binding cassette (ABC) transporter protein | 0.59 | 3.82E-08 | 0.000855 | 0.000107 |
| <i>cit-1.1</i> | Cyclin T                                                 | 0.59 | 8.38E-07 | 0.018735 | 0.000353 |
| Y65B4BR.5      | Predicted transcription factor                           | 0.62 | 8.94E-08 | 0.002    | 0.00014  |
| T08G11.1b      | chorein A                                                | 0.63 | 8.72E-07 | 0.019506 | 0.000355 |
| <i>npp-10</i>  | Nuclear pore complex protein                             | 0.63 | 1.94E-07 | 0.004329 | 0.000203 |
| <i>cua-1</i>   | Putative copper ATPase                                   | 0.64 | 1.15E-06 | 0.025723 | 0.000364 |

\* Represents the geometric mean ratio of expression in the two treatment groups,

\*\* Based on two-sample t-test

\*\*\* Adjusted p-value based on familywise error rate control, using the Bonferroni method

\*\*\*\* Adjusted q-value based on the false discovery rate using the Benjamin-Hochberg Method

**SUPPLEMENTAL TABLE III part ii.**

Gene transcript changes (up-regulated) in response to 10mM LiCl.

| <b>Gene</b>   | <b>Description.</b>                                                                    | <b>Geo.<br/>Mean<br/>ratio</b> | <b>Raw<br/>p-value</b> | <b>FWER<br/>(Bonf)</b> | <b>FDR<br/>(BH)</b> |
|---------------|----------------------------------------------------------------------------------------|--------------------------------|------------------------|------------------------|---------------------|
| W09D6.4       | Putative membrane protein                                                              | 15.58                          | 6.24E-07               | 0.01396                | 0.000308            |
| <i>pgp-6</i>  | P-glycoprotein subclass of the<br>transporters                                         | 9.89                           | 5.30E-07               | 0.011854               | 0.000304            |
| F54D7.3       | Putative ortholog of human<br>gonadotropin releasing hormone<br>receptor               | 6.42                           | 1.98E-06               | 0.044323               | 0.000462            |
| <i>pgp-5</i>  | P-glycoprotein subclass of the<br>transporters                                         | 6.33                           | 1.63E-06               | 0.036451               | 0.000436            |
| <i>his-64</i> | H4 histone                                                                             | 5.82                           | 6.64E-08               | 0.001486               | 0.00014             |
| F19G12.3      | Protein related to argonaute and<br>Dicer protein. PAZ family<br>member                | 5.32                           | 6.32E-07               | 0.014149               | 0.000308            |
| <i>dhs-4</i>  | Predicted mitochondrial short-<br>chain dehydrogenase                                  | 5.26                           | 1.75E-06               | 0.039247               | 0.000451            |
| <i>acr-18</i> | Acetylcholine Receptor                                                                 | 5.10                           | 1.01E-06               | 0.022558               | 0.000364            |
| T24F1.4       | Putative nuclear protein                                                               | 4.97                           | 4.85E-09               | 0.000108               | 2.71E-05            |
| F56A4.11      | Putative protein with at least 17<br>transmembrane domains.                            | 4.91                           | 7.85E-07               | 0.017563               | 0.000338            |
| K07D4.4       | Unknown function                                                                       | 4.85                           | 1.72E-06               | 0.038371               | 0.000447            |
| <i>his-68</i> | H2A histone                                                                            | 4.80                           | 1.44E-07               | 0.003218               | 0.000179            |
| W02B12.4      | Putative protein containing<br>carboxylesterase domain                                 | 4.66                           | 2.05E-06               | 0.045815               | 0.000468            |
| <i>his-8</i>  | H2B histone                                                                            | 4.58                           | 2.17E-07               | 0.004857               | 0.000203            |
| <i>ser-4</i>  | G-protein-coupled 7-<br>transmembrane domain serotonin<br>receptor                     | 4.45                           | 8.51E-07               | 0.019039               | 0.000353            |
| <i>his-45</i> | H3 histone                                                                             | 4.44                           | 1.02E-07               | 0.002271               | 0.00014             |
| Y71D11A.3a    | Predicted 2-amino-3-<br>carboxylmuconate-6-<br>semialdehyde decarboxylase              | 4.44                           | 1.07E-07               | 0.002385               | 0.00014             |
| <i>sri-40</i> | Serpentine receptor, class I.                                                          | 4.25                           | 1.51E-06               | 0.033853               | 0.000423            |
| W02D9.10      | Unknown function                                                                       | 4.24                           | 1.77E-06               | 0.039649               | 0.000451            |
| <i>ugt-39</i> | UDP-glucuronosyl transferase                                                           | 4.18                           | 1.86E-06               | 0.04155                | 0.000462            |
| W01A11.7      | Unknown function                                                                       | 4.06                           | 1.28E-06               | 0.028609               | 0.000387            |
| F40E3.5       | Putative protein containing<br>serine/threonine specific protein<br>phosphatase domain | 3.81                           | 1.00E-06               | 0.022383               | 0.000364            |
| <i>his-7</i>  | H2A histone                                                                            | 3.81                           | 1.62E-08               | 0.000363               | 7.26E-05            |

|               |                                                                                                                  |      |          |          |          |
|---------------|------------------------------------------------------------------------------------------------------------------|------|----------|----------|----------|
| <i>his-61</i> | H2A histone                                                                                                      | 3.80 | 3.36E-07 | 0.007527 | 0.000239 |
| W10G11.19     | Unknown function                                                                                                 | 3.78 | 1.83E-06 | 0.04083  | 0.000459 |
| <i>gst-24</i> | Glutathione S-transferase.                                                                                       | 3.71 | 1.04E-06 | 0.023163 | 0.000364 |
| <i>feh-1</i>  | Ortholog of mammalian FE65.                                                                                      | 3.66 | 1.16E-10 | 2.59E-06 | 2.59E-06 |
| <i>his-62</i> | H2B histone                                                                                                      | 3.60 | 2.56E-08 | 0.000574 | 9.56E-05 |
| <i>acdH-2</i> | Acyl CoA dehydrogenase                                                                                           | 3.55 | 3.31E-07 | 0.007411 | 0.000239 |
| <i>his-67</i> | H4 histone                                                                                                       | 3.54 | 1.35E-06 | 0.030139 | 0.000397 |
| <i>mif-4</i>  | Macrophage migration inhibitory factor related protein                                                           | 3.46 | 3.52E-07 | 0.007885 | 0.000239 |
| <i>his-4</i>  | H2B histone                                                                                                      | 3.42 | 1.75E-07 | 0.003909 | 0.000195 |
| W04B5.3a      | Unknown function                                                                                                 | 3.35 | 5.64E-07 | 0.012606 | 0.000306 |
| Y71H2AM.10    | GBP protein like                                                                                                 | 3.35 | 1.16E-06 | 0.025877 | 0.000364 |
| Y46G5A.19     | Putative spermidine synthase                                                                                     | 3.32 | 3.49E-07 | 0.007809 | 0.000239 |
| <i>mrp-8</i>  | Multidrug Resistance Protein family member.                                                                      | 3.19 | 3.21E-07 | 0.007186 | 0.000239 |
| T20G5.4       | Putative membrane protein, family 8 (53.1 kD)                                                                    | 3.18 | 4.56E-07 | 0.010191 | 0.000275 |
| F43D9.1       | Putative patched family member Delta/Serrate/Lag-2 domain protein.                                               | 3.17 | 6.02E-07 | 0.013458 | 0.000306 |
| <i>dsl-3</i>  | SKp1 related protein                                                                                             | 3.07 | 1.21E-06 | 0.027111 | 0.000371 |
| <i>skr-11</i> | Predicted immunoglobulin-like and EGF-like domain containing protein                                             | 3.00 | 1.94E-06 | 0.043481 | 0.000462 |
| F28E10.2      | Cuticular collagen family member                                                                                 | 2.70 | 1.03E-07 | 0.002307 | 0.00014  |
| <i>dpy-9</i>  | Unknown function                                                                                                 | 2.69 | 5.84E-07 | 0.013055 | 0.000306 |
| F23C8.13      | Insulin related protein                                                                                          | 2.66 | 5.46E-07 | 0.012222 | 0.000306 |
| <i>ins-17</i> | Putative nuclear protein                                                                                         | 2.61 | 9.48E-08 | 0.00212  | 0.00014  |
| H14A12.5      | Predicted spinster-like family member                                                                            | 2.59 | 2.63E-07 | 0.005874 | 0.000225 |
| C39E9.10      | Unknown function                                                                                                 | 2.57 | 7.26E-07 | 0.016238 | 0.000334 |
| C09F5.2       | Putative nuclear protein                                                                                         | 2.55 | 1.00E-06 | 0.022469 | 0.000364 |
| C56G7.3       | Putative protein with at least 7 transmembrane domains                                                           | 2.53 | 1.12E-06 | 0.024947 | 0.000364 |
| C14A6.2       | MAP kinase activated protein kinase                                                                              | 2.52 | 7.27E-07 | 0.016273 | 0.000334 |
| <i>mak-2</i>  | Predicted diacylglycerol O-acyltransferase 2 family member                                                       | 2.40 | 5.12E-08 | 0.001146 | 0.000127 |
| F59A1.10      | I Kappa B homolog. encodes an ortholog of human BCL3 that physically interacts with the checkpoint protein MRT-2 | 2.40 | 9.88E-08 | 0.00221  | 0.00014  |
| <i>ikb-1</i>  | Metridin-like ShK toxin                                                                                          | 2.32 | 1.95E-06 | 0.043652 | 0.000462 |
| F23B12.4      | Putative endoplasmic reticulum protein, with at least 4 transmembrane domains                                    | 2.31 | 2.58E-07 | 0.005768 | 0.000225 |
| F39B2.8       | Putative cytoplasmic protein                                                                                     | 2.29 | 1.64E-06 | 0.036658 | 0.000436 |
| F32B5.6a      | H2A histone                                                                                                      | 2.27 | 1.48E-06 | 0.033133 | 0.000423 |
| <i>his-35</i> | Unknown function                                                                                                 | 2.27 | 4.13E-07 | 0.009231 | 0.000256 |
| Y57A10A.26    | Unknown function                                                                                                 | 2.24 | 1.37E-06 | 0.030733 | 0.000399 |
| C34B2.11      | Unknown function                                                                                                 | 2.20 | 1.13E-06 | 0.025212 | 0.000364 |

|              |                                                                                    |      |          |          |          |
|--------------|------------------------------------------------------------------------------------|------|----------|----------|----------|
| Y66D12A.24   | Putative protein, with at least 2 transmembrane domains                            | 2.18 | 1.93E-06 | 0.043134 | 0.000462 |
| <i>atg-1</i> | Amino acid transporter glycoprotein subunit.                                       | 2.17 | 4.72E-07 | 0.010567 | 0.000278 |
| Y18H1A.9     | Predicted carboxypeptidase a2 precursor family member                              | 2.10 | 1.68E-07 | 0.003763 | 0.000195 |
| C15F1.2      | Putative secreted or extracellular protein precursor, with 2 coiled coil-4 domains | 1.94 | 9.23E-07 | 0.020645 | 0.000358 |
| C13B9.1      | Putative mitochondrial protein                                                     | 1.94 | 2.89E-07 | 0.006473 | 0.000231 |
| Y47G6A.22a   | Predicted short-chain dehydrogenase/reductase                                      | 1.67 | 6.00E-07 | 0.013423 | 0.000306 |
| ZK1307.9     | Putative nuclear protein                                                           | 1.56 | 1.96E-06 | 0.04393  | 0.000462 |



Type of file: table

Label: Supp Table 4

Filename: 2008 McColl JBC supplemental tabel 4.pdf

#### SUPPLEMENTAL TABLE IV

Gene ontologies (GO) for which average expression (across the probes of constituent genes) is associated with treatment with 10mM LiCl.

| GO ID      | GO description                         | Geo.<br>mean<br>ratio* | Raw<br>p-value** | FWER***  | FDR****  |
|------------|----------------------------------------|------------------------|------------------|----------|----------|
| GO:0000786 | nucleosome                             | 1.35                   | 6.04E-05         | 0.009789 | 0.005259 |
| GO:0006334 | nucleosome assembly                    | 1.34                   | 6.49E-05         | 0.010519 | 0.005259 |
| GO:0008415 | acyltransferase activity               | 0.88                   | 0.000117         | 0.018875 | 0.006292 |
| GO:0005783 | endoplasmic reticulum                  | 0.85                   | 0.000158         | 0.025509 | 0.006377 |
| GO:0007001 | chromosome organization and biogenesis | 1.32                   | 0.000254         | 0.041187 | 0.008237 |

\* Represents the geometric mean ratio of expression representing the average expression of probes of genes within over outside the GO.

\*\* Based on two-sample t-test

\*\*\* Adjusted p-value based on family wise error rate control, using the Bonferroni method

\*\*\*\* Adjusted p-value based on the false discovery rate using the Benjamin-Hochberg Method

Type of file: table

Label: Supp Table 5

Filename: 2008 McColl JBC supplemental tabel 5.pdf

### SUPPLEMENTAL TABLE V

Real time-PCR validation of transcripts identified from microarray analysis as responsive to 10mM LiCl.

| <b>Gene</b>    | <b>Geo mean ratio</b> | <b>Fold</b> | <b><i>p</i> value</b> |
|----------------|-----------------------|-------------|-----------------------|
|                |                       |             |                       |
| <i>lea-1</i>   | 0.17                  | 0.27        | 0.003                 |
| <b>ZK813.1</b> | 0.19                  | 0.75        | 0.075                 |
| <b>WO9D6.4</b> | 15.58                 | 42.64       | 7.40E-07              |
| <i>pgp-6</i>   | 9.89                  | 25.10       | 1.34E-05              |

Geometric mean ratio values are taken from microarray data (Supplemental Table III). Fold ( $2^{\Delta\Delta C_T}$ , where  $\Delta C_T$  denotes the difference between the cycle-threshold ( $C_T$ ) for 10mM LiCl treated versus Control samples) indicates relative fold change as assessed by real time-PCR. Statistical significance was defined using Student's *t*-test, where genes with  $p < 0.05$  indicate confirmation by RT-PCR.
